# Supplementary material for: Deciphering the Glycan Preference of Bacterial Lectins by Glycan Array and Molecular Docking with Validation by Microcalorimetry and Crystallography
Source: PubMed Central journal article supplement (PMC3747263; doi:10.1371/journal.pone.0071149), 2013-08-19
Supplement: pone.0071149.s002.pdf [file pone.0071149.s002.pdf]

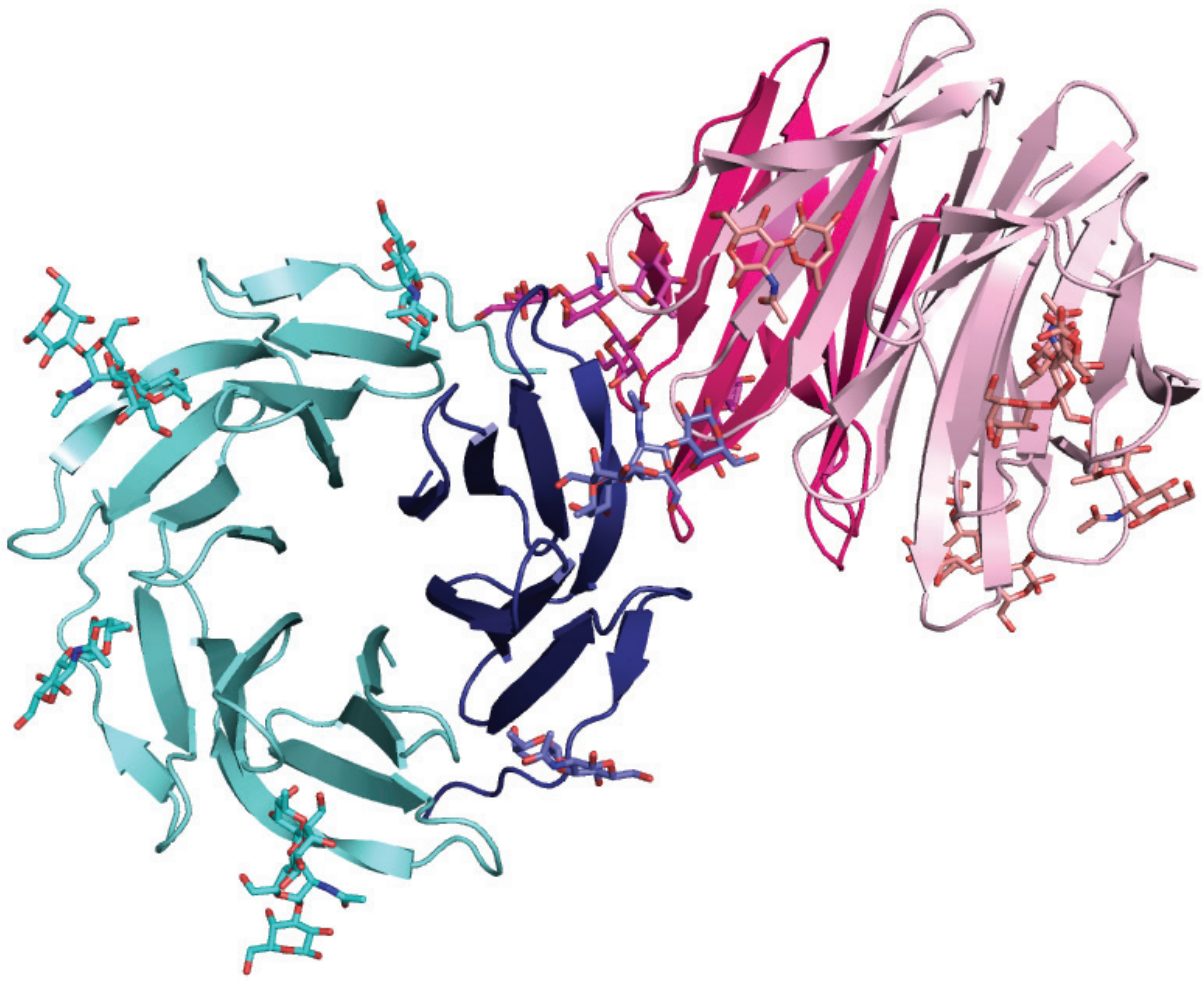

**Figure S2:** Crystal structure of BamBL complexed with Le<sup>x</sup> trisaccharide. The asymmetric unit is represented in blue and magenta and the corresponding  $\beta$ -propellers obtained by 3-fold crystalline symmetry operations are represented in light blue and light pink.
