# Supplementary material for: Deciphering the Glycan Preference of Bacterial Lectins by Glycan Array and Molecular Docking with Validation by Microcalorimetry and Crystallography
Source: PubMed Central journal article supplement (PMC3747263; doi:10.1371/journal.pone.0071149), 2013-08-19
Supplement: pone.0071149.s003.pdf [file pone.0071149.s003.pdf]

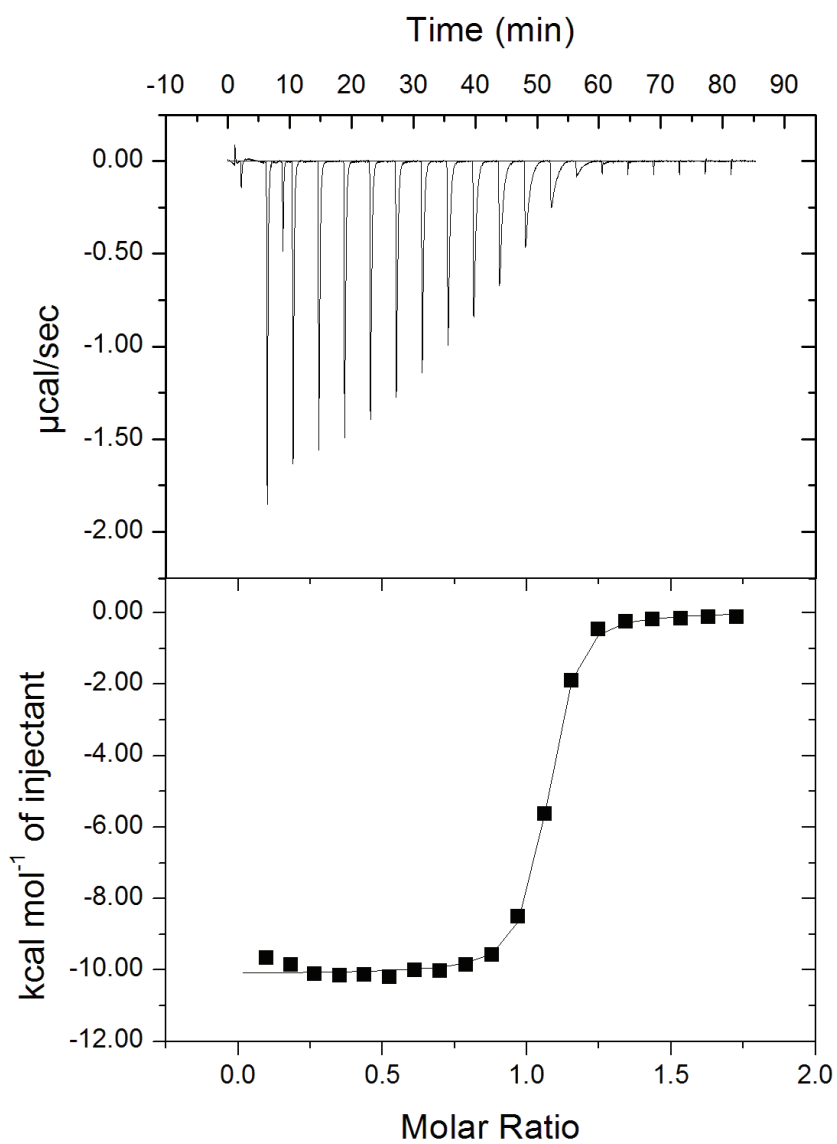

**Figure S3:** Thermogram (top) and titration curve (bottom) obtained from the titration of LecB (150  $\mu\text{M}$ ) by sialyl Lewis a (1.3 mM). Fitting procedure was performed using a one site model.
