# Supplementary material for: Deciphering the Glycan Preference of Bacterial Lectins by Glycan Array and Molecular Docking with Validation by Microcalorimetry and Crystallography
Source: PubMed Central journal article supplement (PMC3747263; doi:10.1371/journal.pone.0071149), 2013-08-19
Supplement: pone.0071149.s004.pdf [file pone.0071149.s004.pdf]

**Table S1:** Details of collection data and statistics.

| <b>Protein</b>                     | <b>BambL/leX</b>       |
|------------------------------------|------------------------|
| <b>Data collection</b>             |                        |
| Wavelength (Å)                     | 1.140                  |
| Space group                        | P 2 <sub>1</sub> 3     |
| Cell dimensions a, b, c (Å)        | 81.4, 81.4, 81.4       |
| Resolution (outer shell) (Å)       | 40.72-1.60 (1.69-1.60) |
| Measured/Unique reflections        | 21930/1180             |
| Average multiplicity (outer shell) | 6.2 (3.4)              |
| Rmerge (outer shell)               | 0.04 (0.1)             |
| Completeness (%) (outer shell)     | 96.2 (82.4)            |
| Mean I/oI (outer shell)            | 26.6 (7.9)             |
| Wilson B                           | 17.4                   |
| <b>Refinement</b>                  |                        |
| Rcryst/Rfree                       | 15.5/18.9              |
| r.m.s.d. bonds (Å)                 | 0.016                  |
| r.m.s.d. angles (°)                | 1.71                   |
| r.m.s.d. chiral (Å <sup>3</sup> )  | 0.10                   |
| Protein atoms                      | 1357                   |
| Bfac (Å <sup>2</sup> )             | 14.4                   |
| Ligand atoms                       | 156                    |
| Bfac (Å <sup>2</sup> )             | 21.0                   |
| Water molecules                    | 237                    |
| Bfac (Å <sup>2</sup> )             | 27.72                  |
| PDB code                           | 3ZW1                   |
