# Supplementary material for: Deciphering the Glycan Preference of Bacterial Lectins by Glycan Array and Molecular Docking with Validation by Microcalorimetry and Crystallography
Source: PubMed Central journal article supplement (PMC3747263; doi:10.1371/journal.pone.0071149), 2013-08-19
Supplement: pone.0071149.s007.pdf [file pone.0071149.s007.pdf]

Table S4: Binding intensities (FU) for labeled BamBL protein with glycan array chips v4.1 from the consortium for functional glycomics. Full data is available on the web site (<http://www.functionalglycomics.org/>)

|               | Glycan Structure                                                        | 10 µg/ml<br>Average | 1 µg/ml<br>Average | 0.1 µg/ml<br>Average |
|---------------|-------------------------------------------------------------------------|---------------------|--------------------|----------------------|
| H-di          | Fuca1-2Galβ-Sp8                                                         | 1                   | 5                  | 3                    |
| H_type1       | Fuca1-2Galβ1-3GlcNAcβ1-3Galβ1-4Glcβ-Sp8                                 | 2321                | 1027               | 683                  |
| H-type1       | Fuca1-2Galβ1-3GlcNAcβ1-3Galβ1-4Glcβ-Sp10                                | 1526                | 1999               | 186                  |
| H-type1       | Fuca1-2Galβ1-3GlcNAcβ-Sp0                                               | 2419                | 1818               | 919                  |
| H-type1       | Fuca1-2Galβ1-3GlcNAcβ-Sp8                                               | 13063               | 9008               | 3686                 |
| H-type1       | Fuca1-2Galβ1-3GlcNAcβ1-3(Galβ1-4GlcNAcβ1-6)Galβ1-4Glc-Sp21              | 970                 | 155                | 126                  |
| H-type2       | Fuca1-2Galβ1-4GlcNAcβ1-3Galβ1-4GlcNAcβ-Sp0                              | 6                   | 1                  | 0                    |
| H-type2       | Fuca1-2Galβ1-4GlcNAcβ1-3Galβ1-4GlcNAcβ1-3Galβ1-4GlcNAcβ-Sp0             | 3                   | 9                  | 5                    |
| H-type2       | Fuca1-2Galβ1-4GlcNAcβ-Sp0                                               | 4                   | 2                  | 3                    |
| H-type2       | Fuca1-2Galβ1-4GlcNAcβ-Sp8                                               | -1                  | 4                  | 2                    |
| H-type3       | Fuca1-2Galβ1-3GalNAcα-Sp8                                               | 3927                | 2990               | 1303                 |
| H-type4       | Fuca1-2Galβ1-3GalNAcβ1-3Galα-Sp9                                        | 342                 | 48                 | 40                   |
| H-type4       | Fuca1-2Galβ1-3GalNAcβ1-3Galα1-4Galβ1-4Glcβ-Sp9                          | 9549                | 6167               | 4179                 |
| H-type5       | Fuca1-2Galβ1-4Glcβ-Sp0                                                  | 4                   | 4                  | 5                    |
| A-tri         | GalNAcα1-3(Fuca1-2)Galβ-Sp8                                             | 5                   | 8                  | 3                    |
| A-tri         | GalNAcα1-3(Fuca1-2)Galβ-Sp18                                            | 2                   | 2                  | 3                    |
| A-type1       | GalNAcα1-3(Fuca1-2)Galβ1-3GlcNAcβ-Sp0                                   | 2                   | 6                  | 5                    |
| A-type2       | GalNAcα1-3(Fuca1-2)Galβ1-4GlcNAcβ-Sp0                                   | 0                   | 10                 | 0                    |
| A-type2       | GalNAcα1-3(Fuca1-2)Galβ1-4GlcNAcβ-Sp8                                   | 3                   | 2                  | 1                    |
| A-type2       | GalNAcα1-3(Fuca1-2)Galβ1-4GlcNAcβ1-3Galβ1-4GlcNAcβ-Sp0                  | 1                   | 7                  | 4                    |
| A-type2       | GalNAcα1-3(Fuca1-2)Galβ1-4GlcNAcβ1-3Galβ1-4GlcNAcβ1-3Galβ1-4GlcNAcβ-Sp0 | 1                   | 9                  | 0                    |
| A-type5       | GalNAcα1-3(Fuca1-2)Galβ1-4Glcβ-Sp0                                      | 2                   | -2                 | 13                   |
| A-LewisY      | GalNAcα1-3(Fuca1-2)Galβ1-4(Fuca1-3)GlcNAcβ-Sp0                          | 2                   | 7                  | 5                    |
| B-tri         | Galα1-3(Fuca1-2)Galβ-Sp8                                                | 5                   | 8                  | 4                    |
| B-tri         | Galα1-3(Fuca1-2)Galβ-Sp18                                               | 3                   | 2                  | 4                    |
| B-type1       | Galα1-3(Fuca1-2)Galβ1-3GlcNAcβ-Sp0                                      | 7                   | 3                  | 3                    |
| B-type1       | Galα1-3(Fuca1-2)Galβ1-3GlcNAcβ-Sp8                                      | 1122                | 517                | 29                   |
| B-type2       | Galα1-3(Fuca1-2)Galβ1-4GlcNAc-Sp0                                       | 6                   | 12                 | 5                    |
| B-type3       | Galα1-3(Fuca1-2)Galβ1-3GalNAcα-Sp8                                      | 37                  | 5                  | 1                    |
| B-type4       | Galα1-3(Fuca1-2)Galβ1-3GalNAcβ-Sp8                                      | 77                  | 1205               | 292                  |
| B-type5       | Galα1-3(Fuca1-2)Galβ1-4Glcβ-Sp0                                         | 2                   | 2                  | 2                    |
| B-LewisY      | Galα1-3(Fuca1-2)Galβ1-4(Fuca1-3)GlcNAcβ-Sp0                             | 6                   | 15                 | 8                    |
| B-LewisY      | Galα1-3(Fuca1-2)Galβ1-4(Fuca1-3)GlcNAcβ-Sp8                             | 389                 | 52                 | 5                    |
| LewisA        | Galβ1-3(Fuca1-4)GlcNAcβ1-3Galβ1-4GlcNAcβ-Sp0                            | 0                   | -2                 | 3                    |
| LewisA        | Galβ1-3(Fuca1-4)GlcNAcβ-Sp0                                             | 2                   | 9                  | -5                   |
| LewisA        | Galβ1-3(Fuca1-4)GlcNAcβ-Sp8                                             | 3                   | 1                  | 3                    |
| Sialyl_LewisA | Neu5Acα2-3Galβ1-3(Fuca1-4)GlcNAcβ-Sp8                                   | 4                   | 9                  | 2                    |
| LewisA_sulfo  | [3OSO3]Galβ1-3(Fuca1-4)GlcNAcβ-Sp8                                      | 5                   | 6                  | -1                   |
| LewisB        | Fuca1-2Galβ1-3(Fuca1-4)GlcNAcβ-Sp8                                      | 25753               | 13533              | 6647                 |
| LewisB        | Fuca1-2Galβ1-3(Fuca1-4)GlcNAcβ1-3(Galβ1-4GlcNAcβ1-6)Galβ1-4Glc-Sp21     | 13453               | 10217              | 5405                 |
| LewisX        | Galβ1-4(Fuca1-3)GlcNAcβ-Sp0                                             | 3                   | 4                  | -2                   |
| LewisX        | Galβ1-4(Fuca1-3)GlcNAcβ-Sp8                                             | 3                   | 5                  | 0                    |
| LewisX        | Galβ1-4(Fuca1-3)GlcNAcβ1-4Galβ1-4(Fuca1-3)GlcNAcβ-Sp0                   | 1                   | -5                 | 3                    |
| LewisX        | Galβ1-3GlcNAcβ1-3(Galβ1-4(Fuca1-3)GlcNAcβ1-6)Galβ1-4Glc-Sp21            | 6                   | 1                  | 4                    |
| Sialyl_LewisX | Neu5Acα2-3Galβ1-4(Fuca1-3)GlcNAcβ-Sp0                                   | 3                   | 18                 | -2                   |
| Sialyl_LewisX | Neu5Acα2-3Galβ1-4(Fuca1-3)GlcNAcβ-Sp8                                   | 4                   | 2                  | 3                    |
| Sialyl_LewisX | Neu5Acα2-3Galβ1-4(Fuca1-3)GlcNAcβ1-3Galβ-Sp8                            | 5                   | 3                  | 0                    |
| Sialyl_LewisX | Neu5Acα2-3Galβ1-4(Fuca1-3)GlcNAcβ1-3Galβ1-4GlcNAcβ-Sp8                  | 9                   | 16                 | 5                    |
| LewisX_sulfo  | [3OSO3]Galβ1-4(Fuca1-3)GlcNAc-Sp0                                       | 14                  | 0                  | 3                    |
| LewisX_sulfo  | [3OSO3]Galβ1-4(Fuca1-3)GlcNAcβ-Sp8                                      | 10                  | 8                  | 9                    |
| LewisX_sulfo  | Galβ1-4(Fuca1-3)[6OSO3]GlcNAc-Sp0                                       | 4                   | 19                 | 3                    |
| LewisY        | Fuca1-2Galβ1-4(Fuca1-3)GlcNAcβ-Sp0                                      | 1407                | 435                | 91                   |
| LewisY        | Fuca1-2Galβ1-4(Fuca1-3)GlcNAcβ-Sp8                                      | 1632                | 2097               | 287                  |
