# Supplementary material for: Deciphering the Glycan Preference of Bacterial Lectins by Glycan Array and Molecular Docking with Validation by Microcalorimetry and Crystallography
Source: PLoS One. 2013 Aug 19;8(8):e71149. doi: 10.1371/journal.pone.0071149 (PMC3747263; doi:10.1371/journal.pone.0071149)
Supplement: Table S2 — Glycosidic linkage conformations for all starting models of oligosaccharides. The Φ and Ψ torsion angles for a glycosidic 1—x linkage are described as Φ = O5-C1-O1-C′x and Ψ = C1-O1-C′x-C′x+1. (PDF) [file pone.0071149.s005.pdf]

**Table S2:** Glycosidic linkage conformations for all starting models of oligosaccharides.

The  $\Phi$  /  $\Psi$  torsion angles for a glycosidic 1—x linkage are described as  $\Phi = \text{O5-C1-O1-C}'_x$  and  $\Psi = \text{C1-O1-C}'_x\text{-C}'_{x+1}$

| dihedral angle         | conf | H-1    |        | H-2    |        | A-tri  |        | Le <sup>x</sup> |        | sLe <sup>x</sup> |        | Le <sup>a</sup> |        | sLe <sup>a</sup> |        |
|------------------------|------|--------|--------|--------|--------|--------|--------|-----------------|--------|------------------|--------|-----------------|--------|------------------|--------|
|                        |      | $\phi$ | $\psi$ | $\phi$ | $\psi$ | $\phi$ | $\psi$ | $\phi$          | $\psi$ | $\phi$           | $\psi$ | $\phi$          | $\psi$ | $\phi$           | $\psi$ |
| Fuc $\alpha$ 1-2Gal    | 1    | -80    | 264    | -79    | 266    | -95    | 193    |                 |        |                  |        |                 |        |                  |        |
|                        | 2    | -97    | 192    | -95    | 191    | -69    | 273    |                 |        |                  |        |                 |        |                  |        |
|                        | 3    | -104   | 194    | -76    | 271    | -89    | 184    |                 |        |                  |        |                 |        |                  |        |
| Fuc $\alpha$ 1-3GlcNAc | 1    |        |        |        |        |        |        | -78             | 150    | -77              | 145    |                 |        |                  |        |
|                        | 2    |        |        |        |        |        |        | -151            | 92     | -77              | 145    |                 |        |                  |        |
| Fuc $\alpha$ 1-4GlcNAc | 1    |        |        |        |        |        |        |                 |        |                  |        | -79             | 262    | -80              | 259    |
|                        | 2    |        |        |        |        |        |        |                 |        |                  |        | -104            | 193    | -79              | 260    |
|                        | 3    |        |        |        |        |        |        |                 |        |                  |        |                 |        | -79              | 260    |
|                        | 4    |        |        |        |        |        |        |                 |        |                  |        |                 |        | -93              | 51.8   |
| Gal $\beta$ 1-3GlcNAc  | 1    | -74    | 137    |        |        |        |        |                 |        |                  |        | -76             | 142    | -69              | 134    |
|                        | 2    | -89    | 67     |        |        |        |        |                 |        |                  |        | -64             | 172    | -71              | 135    |
|                        | 3    | -64    | 169    |        |        |        |        |                 |        |                  |        |                 |        | -71              | 134    |
|                        | 4    |        |        |        |        |        |        |                 |        |                  |        |                 |        | -64              | 159    |
| Gal $\beta$ 1-4GlcNAc  | 1    |        |        | -76    | 247    |        |        | -75             | -104   | -73              | 252    |                 |        |                  |        |
|                        | 2    |        |        | -88    | 182    |        |        | -77             | -102   | -71              | 360    |                 |        |                  |        |
|                        | 3    |        |        | -80    | 64     |        |        |                 |        |                  |        |                 |        |                  |        |
| GalNAc $\alpha$ 1-3Gal | 1    |        |        |        |        | 72     | 78     |                 |        |                  |        |                 |        |                  |        |
|                        | 2    |        |        |        |        | 71     | 68     |                 |        |                  |        |                 |        |                  |        |
|                        | 3    |        |        |        |        | 90     | 175    |                 |        |                  |        |                 |        |                  |        |
